# Supplementary material
Source: Research Square preprint supplement (doi:10.21203/rs.3.rs-8922069/v1)
Supplement: Supplementary file 1 [file 69e751f4730a1ae9b6ceb8fa.docx]

**Supplementary materials**

**S-Table 1. The Severity Level of Each Neuropsychiatric Symptom in the Overall Sample**

| **Neuropsychiatric symptoms** | **Severity of NPS** | | |
| --- | --- | --- | --- |
| **Mild** | **Moderate** | **Severe** |
| Apathy (n=97) | 41 (42.3%) | 47 (48.5%) | 9 (9.3%) |
| Depression (n=99) | 45 (45.5%) | 43 (43.3%) | 11 (11.1%) |
| Irritability (n=82) | 46 (56.1%) | 28 (34.1%) | 8 (9.8%) |
| Nighttime behaviour (n=79) | 36 (45.6%) | 36 (45.6%) | 7 (8.9%) |
| Appetite (n=74) | 40 (54.1%) | 23 (31.1%) | 11 (14.9%) |
| Agitation (n=54) | 30 (55.6%) | 20 (37%) | 4 (7.4%) |
| Anxiety (n=53) | 22 (41.5%) | 25 (47.2%) | 6 (11.3%) |
| Motor disturbance (n=33) | 17 (51.5%) | 11 (33.3%) | 5 (15.2%) |
| Disinhibition (n=32) | 16 (50%) | 15 (46.9%) | 1 (3.1%) |
| Hallucinations (n=18) | 5 (27.8%) | 6 (33.3%) | 7 (38.9%) |
| Delusions (n=14) | 4 (28.6%) | 6 (42.9%) | 4 (28.6%) |
| Euphoria (n=9) | 5 (55.6%) | 3 (33.3%) | 1 (11.1%) |

**S-Table 2. Most Frequent Symptom Triads of NPS (Co-occurrence Rate >10%)**

| **Dementia (n=129)** | **Number of individuals with this co-occurrence** | **Percentage (%)** |
| --- | --- | --- |
| Apathy + Irritability + Nightime_Behaviors | 16 | 12.4% |
| Depression + Anxiety + Apathy | 14 | 10.9% |
| Depression + Apathy + Irritability | 14 | 10.9% |
| Depression + Apathy + Nightime_Behaviors | 14 | 10.9% |
| Agitation_Aggression + Apathy + Nightime_Behaviors | 13 | 10.1% |
| Depression + Apathy + Appetite | 13 | 10.1% |
| Depression + Irritability + Nightime_Behaviors | 13 | 10.1% |
| Apathy + Nightime_Behaviors + Appetite | 13 | 10.1% |
| **MCI (n=59)** |  |  |
| Depression + Apathy + Irritability | 7 | 11.9% |
| Depression + Irritability + Appetite | 6 | 10.2% |
| Irritability + Nightime_Behaviors + Appetite | 6 | 10.2% |
| **No memory disorder (n=54)** |  |  |
| Depression + Apathy + Appetite | 11 | 20.4% |
| Depression + Irritability + Appetite | 10 | 18.5% |
| Apathy + Irritability + Appetite | 10 | 18.5% |
| Agitation_Aggression + Depression + Apathy | 9 | 16.7% |
| Depression + Apathy + Irritability | 9 | 16.7% |
| Depression + Apathy + Nightime_Behaviors | 9 | 16.7% |
| Apathy + Irritability + Nightime_Behaviors | 9 | 16.7% |
| Apathy + Nightime_Behaviors + Appetite | 9 | 16.7% |
| Irritability + Nightime_Behaviors + Appetite | 9 | 16.7% |
| Depression + Nightime_Behaviors + Appetite | 8 | 14.8% |
| Agitation_Aggression + Depression + Nightime_Behaviors | 7 | 13.0% |
| Agitation_Aggression + Apathy + Irritability | 7 | 13.0% |
| Agitation_Aggression + Apathy + Nightime_Behaviors | 7 | 13.0% |
| Depression + Irritability + Nightime_Behaviors | 7 | 13.0% |
| Agitation_Aggression + Irritability + Appetite | 6 | 11.1% |
| Depression + Anxiety + Apathy | 6 | 11.1% |
| Depression + Anxiety + Appetite | 6 | 11.1% |
| Anxiety + Apathy + Appetite | 6 | 11.1% |
| Anxiety + Irritability + Nightime_Behaviors | 6 | 11.1% |
| Anxiety + Irritability + Appetite | 6 | 11.1% |
| Anxiety + Nightime_Behaviors + Appetite | 6 | 11.1% |
| Disinhibition + Irritability + Appetite | 6 | 11.1% |

**S-Table 3. The P-value Matrix of Spearman's Correlation between NPS and Correlates**

| **Correlates** | **NPI_severity_total** | **NPI_symptom_total** |
| --- | --- | --- |
| Patient_Age | 0.31 | 0.43 |
| Patient_Gender_Male | 0.41 | 0.09 |
| Education_Years | 0.14 | 0.86 |
| Sleep_Hours | 0.49 | 0.73 |
| Physical_Active | 0.04 | 0.01 |
| Alcohol_YN | 0.28 | 0.28 |
| Frailty | 0.01 | <0.01 |
| PHQ_9_Total | <0.01 | <0.01 |
| IQCODE_Total_Score | <0.01 | <0.01 |
| ACE_total_score | 0.32 | 0.26 |
| Patient_HealthToday | 0.10 | 0.05 |
| LTCQ8_totalS | <0.01 | <0.01 |
| carer_age | 0.70 | 0.26 |
| Carer_gender_Female | 0.06 | 0.01 |
| Carer_Health_Today | <0.01 | <0.01 |
| Carer_LTCQ_totalS | <0.01 | <0.01 |
| NPI_distress_total | <0.01 | <0.01 |
| RSS_totalS | <0.01 | <0.01 |
| RSS_ED | <0.01 | <0.01 |
| RSS_SD | <0.01 | <0.01 |
| RSS_NF | <0.01 | <0.01 |

**S-Table 4: Model Estimates for NPS Based on Diagnosis and Adjusted Factors (n=147)**

| **Model** | **Predictors** | **β** | **P value (β)** | **95% CI** | | **R2** | **Adjusted R²** | **F** | **P value (F)** | **ΔR²** | **Δ F** | **P value (ΔF)** |
| --- | --- | --- | --- | --- | --- | --- | --- | --- | --- | --- | --- | --- |
| **Lower** | **Upper** |
| 1.Diagnosis only | Constant | 2.87 | <0.001 | 2.14 | 3.59 | 0.08 | 0.08 | 6.14 | 0.003 | 0.08 | 6.14 | 0.003 |
| MCI (vs. non-dem) | -1.25 | 0.014 | -2.24 | -0.26 |  |  |  |  |  |  |  |
| Dementia (vs. non-dem) | 0.16 | 0.71 | -0.69 | 1.00 |  |  |  |  |  |  |  |
| 2.Diagnosis +IQCODE | Constant | -4.85 | <0.001 | -7.03 | -2.67 | 0.33 | 0.31 | 23.31 | <0.001 | 0.25 | 53.20 | <0.001 |
| MCI (vs. non-dem) | -1.32 | 0.003 | -2.17 | -0.47 |  |  |  |  |  |  |  |
| Dementia (vs. non-dem) | -1.05 | 0.010 | -1.85 | -0.26 |  |  |  |  |  |  |  |
| IQCODE | 2.20 | <0.001 | 1.60 | 2.80 |  |  |  |  |  |  |  |
| 3.Diagnosis +IQCODE + RSS | Constant | -2.71 | 0.011 | -4.79 | -0.63 | 0.46 | 0.45 | 30.68 | <0.001 | 0.14 | 35.80 | <0.001 |
| MCI (vs. non-dem) | -0.98 | 0.013 | -1.75 | -0.21 |  |  |  |  |  |  |  |
| Dementia (vs. non-dem) | -0.70 | 0.058 | -1.42 | 0.03 |  |  |  |  |  |  |  |
| IQCODE | 1.23 | <0.001 | 0.61 | 1.86 |  |  |  |  |  |  |  |
| RSS | 0.09 | <0.001 | 0.06 | 0.13 |  |  |  |  |  |  |  |

**S-Table 5. The Caregiver Distress of Each Neuropsychiatric Symptom in the Overall Sample**

| **Neuropsychiatric symptoms** | **Severity of Distress Due to the NPS** | | |
| --- | --- | --- | --- |
| **Not at all** | **Minimal to Mild** | **Moderate and above** |
| Apathy (n=100) | 4 (4%) | 60 (60%) | 36 (36%) |
| Depression (n=101) | 0 | 51 (50.5%) | 50 (49.5%) |
| Irritability (n=85) | 3 (3.5%) | 46 (54.1%) | 36 (42.4%) |
| Nighttime behaviour (n=82) | 14 (17.1%) | 35 (42.7%) | 33 (40.2%) |
| Appetite (n=75) | 10 (13.3%) | 40 (53.3%) | 25 (33.3%) |
| Agitation (n=58) | 2 (3.4%) | 26 (44.8%) | 30 (51.7%) |
| Anxiety (n=53) | 2 (3.8%) | 25 (47.2%) | 26 (49.1%) |
| Motor disturbance (n=36) | 4 (11.1%) | 12 (33.3%) | 20 (55.6%) |
| Disinhibition (n=33) | 3 (9.1%) | 16 (48.5%) | 14 (42.4%) |
| Hallucinations (n=18) | 1 (5.6%) | 5 (27.8%) | 12 (66.7%) |
| Delusions (n=15) | 1 (6.7%) | 5 (33.3%) | 9 (60%) |
| Euphoria (n=9) | 2 (22.2%) | 5 (55.6%) | 2 (22.2%) |

**S-Table 6. The P-value Matrix of Spearman's Correlation between Caregiver Distress and Correlates**

| **Correlates** | **RSS_totalS** | **NPI_distress_total** |
| --- | --- | --- |
| ACE_total_score | 0.22 | 0.39 |
| IQCODE_Total_Score | <0.01 | <0.01 |
| NPI_severity_total | <0.01 | <0.01 |
| NPI_symptom_total | <0.01 | <0.01 |
| PHQ_9_Total | 0.01 | <0.01 |
| Frailty | 0.03 | 0.01 |
| LTCQ8_totalS | <0.01 | <0.01 |
| carer_age | 0.12 | 0.91 |
| Carer_gender_Female | 0.02 | 0.03 |
| Carer_Health_Today | - | <0.01 |
| Carer_LTCQ_totalS | - | <0.01 |
| Patient_HealthToday | - | 0.04 |
